# Supplementary material for: A highly stable bimetallic organic framework for enhanced electrical performance of cellulose nanofiber-based triboelectric nanogenerators
Source: Royal Society of Chemistry journal article supplement (doi:10.1039/d2na00379a), 2022-01-01
Supplement: d2na00379a1.pdf [file d2na00379a1.pdf]

## Appendix A. Supplementary data

### Self-driven system powered by carbon-nanotube-functionalized aminated cellulose nanogenerators for electrocatalytic treatment of dye wastewater

Tingting Wang,<sup>a,c</sup> Qiuxiao Zhu,<sup>a</sup> Qi Zhu,<sup>c</sup> Yifeng Yang,<sup>c</sup> Shuangfei Wang<sup>a,b,c</sup> and Lianxin Luo<sup>\*a,b</sup>

<sup>a</sup> College of Light Industry and Food Engineering, Guangxi University, Nanning 534000, China

<sup>b</sup> Guangxi Key Lab of Clean Pulp and Papermaking and Pollution Control, Guangxi University,  
Nanning 534000, China

<sup>c</sup> Guangxi Bossco Environment Protecting Technology Co., Ltd., Nanning 534000, China

E-mail address: luolianxin@gxu.edu.cn (Lianxin Luo)

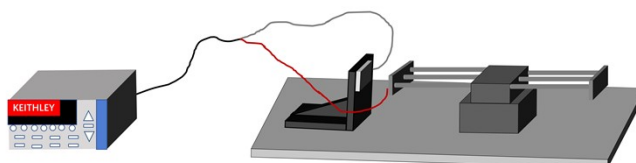

Fig. S1 Schematic of TENG assembly.
